# Supplementary material for: Relationships and Mendelian Randomization of Gut Microbe-Derived Metabolites with Metabolic Syndrome Traits in the METSIM Cohort
Source: MDPI journal article supplement (doi:10.3390/metabo14030174), 2024-03-20
Supplement: s1 [file s1]

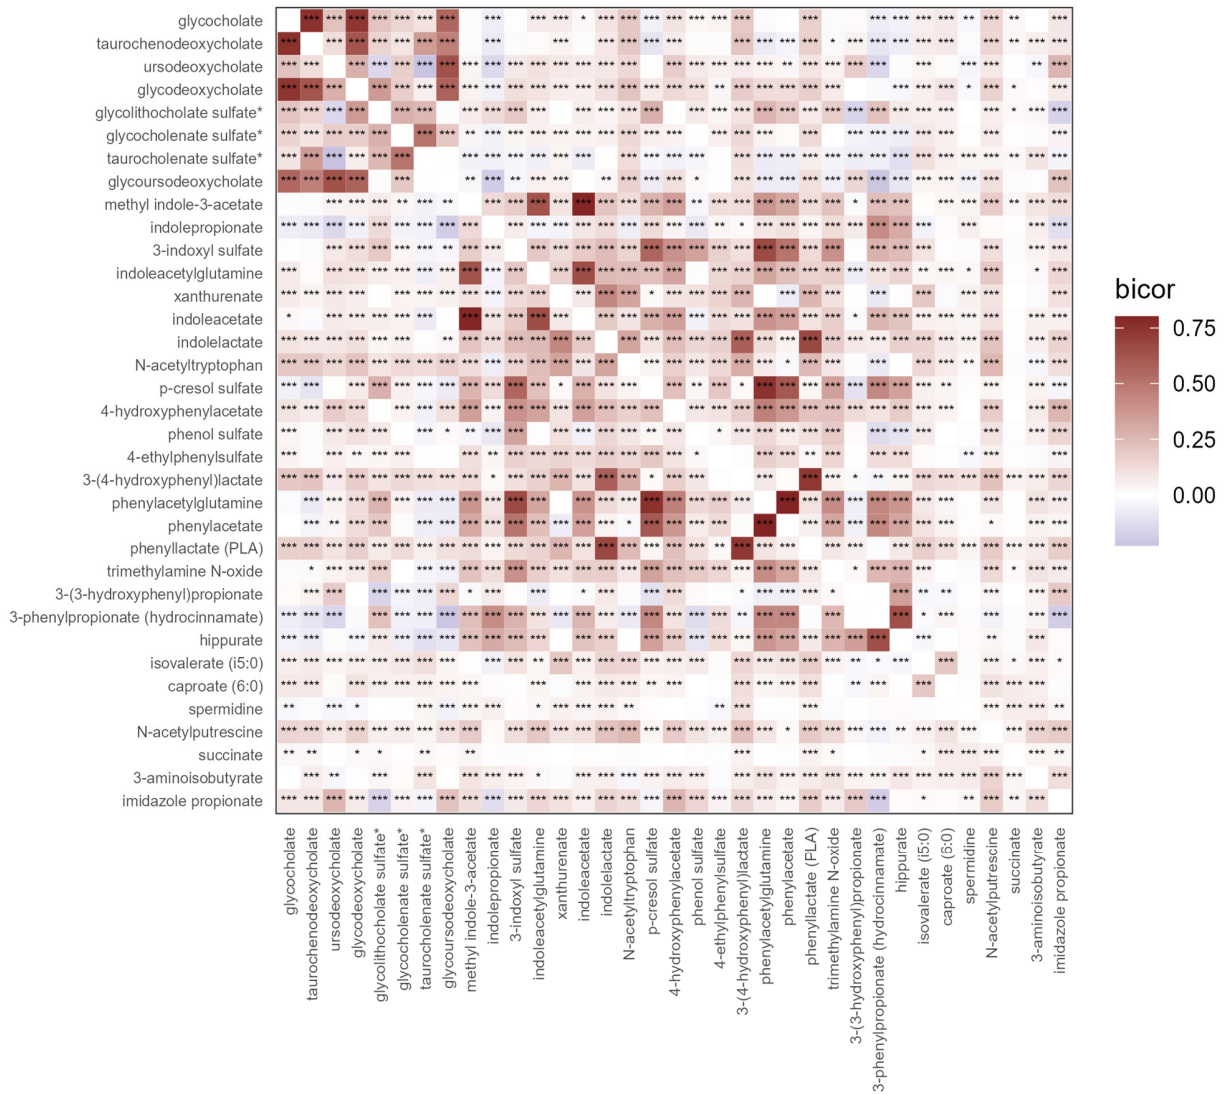

Supplementary Figure S1. Shows pairwise correlation heatmap of plasma microbe-derived metabolites.

Supplementary Table S1. Associations between gut microbe-derived metabolites and metabolic traits.

| Gut Derived Metabolites       | Insulin           |        |          | HOMA-IR             |       |          |
|-------------------------------|-------------------|--------|----------|---------------------|-------|----------|
|                               | Beta              | SD     | P        | Beta                | SD    | P        |
| 3-(4-hydroxyphenyl)lactate    | 0.276             | 0.020  | 1.84E-41 | 0.231               | 0.019 | 4.41E-33 |
| N-acetyltryptophan            | 0.032             | 0.011  | 0.005    | 0.02                | 0.013 | 0.033    |
| xanthurenate                  | 0.034             | 0.007  | 8.7E-07  | 0.035               | 0.007 | 4.7E-06  |
| 3-indoxyl sulfate             | 0.069             | 0.008  | 1.2E-14  | 0.036               | 0.009 | 2.2E-04  |
| spermidine                    | 0.019             | 0.005  | 1.5E-04  | 0.033               | 0.005 | 4.9E-09  |
| indoleacetylglutamine         | 0.015             | 0.003  | 8.9E-06  | 0.010               | 0.003 | 0.006    |
| taurochenodeoxycholate        | 0.035             | 0.004  | 4.3E-14  | 0.040               | 0.004 | 1.2E-16  |
| ursodeoxycholate              | 0.007             | 0.002  | 0.003    | 0.008               | 0.002 | 0.004    |
| glycodeoxycholate             | 0.007             | 0.001  | 1.2E-05  | 0.007               | 0.001 | 1.1E-04  |
| glycocholate                  | 0.044             | 0.006  | 1.5E-11  | 0.040               | 0.007 | 2.0E-08  |
| 3-aminoisobutyrate            | -0.170            | 0.011  | 3.6E-51  | -0.190              | 0.012 | 3.8E-51  |
| succinate                     | -0.020            | 0.005  | 4.5E-04  | -0.023              | 0.006 | 4.2E-04  |
| indolelactate                 | -0.091            | 0.022  | 6.7E-05  |                     |       |          |
| glycolithocholate sulfate*    | -0.032            | 0.005  | 3.8E-08  |                     |       |          |
| taurochenolate sulfate*       | 0.032             | 0.009  | 2.8E-04  |                     |       |          |
| indolepropionate              | 0.010             | 0.004  | 0.034    |                     |       |          |
| 4-hydroxyphenylacetate        |                   |        |          | 0.020               | 0.005 | 2.0E-04  |
| Gut Derived Metabolites       | HDL-C             |        |          | LDL-C               |       |          |
|                               | Beta              | SD     | P        | Beta                | SD    | P        |
| 3-indoxyl sulfate             | -0.034            | 0.004  | 1.2E-14  |                     |       |          |
| indoleacetylglutamine         | -0.008            | 0.001  | 2.7E-06  |                     |       |          |
| 4-ethylphenylsulfate          | -0.014            | 0.003  | 2.9E-05  |                     |       |          |
| indolelactate                 | -0.030            | 0.009  | 6.5E-04  |                     |       |          |
| spermidine                    | -0.007            | 0.002  | 0.001    |                     |       |          |
| succinate                     | 0.010             | 0.002  | 4.4E-04  |                     |       |          |
| glycochenolate sulfate*       | -0.040            | 0.005  | 2.5E-12  |                     |       |          |
| N-acetylputrescine            | 0.051             | 0.008  | 2.7E-09  |                     |       |          |
| glycoursodeoxycholate         | 0.012             | 0.002  | 2.1E-08  |                     |       |          |
| glycolithocholate sulfate*    | 0.009             | 0.002  | 3.2E-04  | -0.018              | 0.002 | 1.8E-13  |
| taurochenodeoxycholate        | -0.005            | 0.001  | 0.001    | -0.004              | 0.001 | 0.015    |
| imidazole propionate          | -0.007            | 0.003  | 0.020    | -0.019              | 0.003 | 5.2E-09  |
| N-acetyltryptophan            |                   |        |          | 0.034               | 0.005 | 5.8E-10  |
| taurochenolate sulfate*       |                   |        |          | 0.038               | 0.004 | 4.2E-19  |
| 3-aminoisobutyrate            |                   |        |          | -0.027              | 0.005 | 1.09E-06 |
| ursodeoxycholate              |                   |        |          | 0.006               | 0.001 | 5.1E-07  |
| xanthurenate                  |                   |        |          | 0.012               | 0.003 | 1.3E-04  |
| Gut Derived Metabolites       | Total cholesterol |        |          | Total Triglycerides |       |          |
|                               | Beta              | SD     | P        | Beta                | SD    | P        |
| N-acetyltryptophan            | 0.030             | 0.003  | 2.3E-14  | 0.087               | 0.010 | 1.3E-16  |
| 3-aminoisobutyrate            | -0.022            | 0.003  | 1.3E-08  | -0.128              | 0.010 | 5.9E-36  |
| phenylacetate                 | -0.005            | 0.001  | 3.5E-04  | -0.024              | 0.004 | 2.4E-09  |
| indoleacetate                 | -0.011            | 0.003  | 6.2E-04  | -0.044              | 0.009 | 5.8E-06  |
| ursodeoxycholate              | 0.005             | 0.0009 | 4.9E-08  |                     |       |          |
| taurochenolate sulfate*       | 0.011             | 0.002  | 4.1E-05  |                     |       |          |
| imidazole propionate          | -0.009            | 0.002  | 9.9E-05  |                     |       |          |
| indolepropionate              | -0.006            | 0.001  | 4.5E-04  |                     |       |          |
| xanthurenate                  | 0.007             | 0.002  | 0.001    |                     |       |          |
| trimethylamine N-oxide        | -0.008            | 0.003  | 0.012    |                     |       |          |
| hippurate                     | 0.008             | 0.002  | 4.7E-04  |                     |       |          |
| 3-(3-hydroxyphenyl)propionate | -0.003            | 0.0009 | 0.001    |                     |       |          |
| 4-hydroxyphenylacetate        | 0.003             | 0.001  | 0.027    |                     |       |          |
| indolelactate                 |                   |        |          | 0.108               | 0.020 | 7.4E-08  |
| 3-phenylpropionate            |                   |        |          | -0.017              | 0.003 | 1.4E-07  |
| indoleacetylglutamine         |                   |        |          | 0.033               | 0.003 | 1.3E-20  |
| N-acetylputrescine            |                   |        |          | 0.107               | 0.016 | 2.9E-11  |

|                            |                         |        |         |                          |        |         |          |       |         |
|----------------------------|-------------------------|--------|---------|--------------------------|--------|---------|----------|-------|---------|
| glycocholate               |                         |        |         | 0.023                    | 0.004  | 8.3E-08 |          |       |         |
| phenol sulfate             |                         |        |         | 0.018                    | 0.006  | 0.007   |          |       |         |
| 3-indoxyl sulfate          |                         |        |         | 0.050                    | 0.009  | 2.5E-07 |          |       |         |
| glycodeoxycholate          |                         |        |         | 0.006                    | 0.001  | 1.9E-05 |          |       |         |
| 3-(4-hydroxyphenyl)lactate |                         |        |         | 0.045                    | 0.018  | 0.012   |          |       |         |
| glycolithocholate sulfate* |                         |        |         | -0.011                   | 0.005  | 0.017   |          |       |         |
| Gut Derived Metabolites    | Systolic blood pressure |        |         | Diastolic blood pressure |        |         |          |       |         |
|                            | Beta                    | SD     | P       | Beta                     | SD     | P       |          |       |         |
| N-acetyltryptophan         | 0.012                   | 0.002  | 2.5E-06 | 0.011                    | 0.002  | 3.4E-06 |          |       |         |
| 3-(4-hydroxyphenyl)lactate | 0.011                   | 0.003  | 0.002   | 0.034                    | 0.005  | 2.8E-12 |          |       |         |
| glycocholate               | 0.004                   | 0.001  | 2.3E-05 | 0.002                    | 0.0009 | 0.021   |          |       |         |
| 4-ethylphenylsulfate       | -0.004                  | 0.001  | 0.005   | -0.003                   | 0.001  | 0.033   |          |       |         |
| hippurate                  | -0.007                  | 0.001  | 5.2E-09 |                          |        |         |          |       |         |
| glycocholenate sulfate*    | 0.008                   | 0.002  | 7.5E-04 |                          |        |         |          |       |         |
| N-acetylputrescine         |                         |        |         | 0.014                    | 0.003  | 6.6E-05 |          |       |         |
| xanthurenate               |                         |        |         | 0.006                    | 0.001  | 1.3E-05 |          |       |         |
| phenylacetate              |                         |        |         | -0.003                   | 0.0007 | 2.4E-06 |          |       |         |
| phenyllactate              |                         |        |         | -0.016                   | 0.005  | 0.001   |          |       |         |
| trimethylamine N-oxide     |                         |        |         | -0.008                   | 0.002  | 3.7E-05 |          |       |         |
| Gut Derived Metabolites    | BMI                     |        |         | WHR                      |        |         | Fat Mass |       |         |
|                            | Beta                    | SD     | P       | Beta                     | SD     | P       | Beta     | SD    | P       |
| N-acetyltryptophan         | 0.025                   | 0.003  | 1.3E-16 | 0.005                    | 0.001  | 3.0E-07 | 0.010    | 0.003 | 0.007   |
| methyl indole-3-acetate    | 0.004                   | 0.001  | 5.7E-05 | 0.001                    | 0.0004 | 4.7E-04 | 0.003    | 0.001 | 0.011   |
| taurocholenate sulfate*    | 0.008                   | 0.002  | 1.9E-04 | 0.004                    | 0.0007 | 2.4E-09 |          |       |         |
| glycodeoxycholate          | 0.003                   | 0.0004 | 3.9E-11 | 0.004                    | 0.0001 | 0.003   |          |       |         |
| 4-hydroxyphenylacetate     | 0.003                   | 0.001  | 0.006   | 0.001                    | 0.0004 | 0.025   |          |       |         |
| 3-aminoisobutyrate         | -0.014                  | 0.002  | 5.2E-07 | 0.002                    | 0.001  | 0.014   |          |       |         |
| succinate                  | -0.004                  | 0.001  | 0.002   | -0.001                   | 0.0005 | 6.0E-04 |          |       |         |
| phenylacetate              | -0.004                  | 0.001  | 6.5E-05 | -0.001                   | 0.0004 | 3.7E-04 |          |       |         |
| phenyllactate              | -0.035                  | 0.006  | 6.1E-08 | -0.011                   | 0.001  | 8.9E-14 |          |       |         |
| hippurate                  | -0.007                  | 0.001  | 3.6E-07 | -0.003                   | 0.0005 | 1.6E-10 |          |       |         |
| xanthurenate               | 0.023                   | 0.001  | 3.8E-36 |                          |        |         | 0.006    | 0.002 | 0.012   |
| indolelactate              | -0.021                  | 0.006  | 0.001   |                          |        |         | -0.020   | 0.006 | 0.001   |
| taurochenodeoxycholate     | 0.004                   | 0.001  | 9.5E-06 |                          |        |         | 0.005    | 0.001 | 5.0E-06 |
| ursodeoxycholate           | 0.007                   | 0.0008 | 1.4E-18 |                          |        |         |          |       |         |
| glycoursodeoxycholate      | -0.011                  | 0.001  | 7.0E-17 |                          |        |         |          |       |         |
| N-acetylputrescine         | -0.036                  | 0.004  | 5.0E-15 |                          |        |         |          |       |         |
| isovalerate (i5:0)         | 0.008                   | 0.001  | 3.7E-06 |                          |        |         |          |       |         |
| glycolithocholate sulfate* | -0.008                  | 0.001  | 9.9E-08 |                          |        |         |          |       |         |
| 3-(4-hydroxyphenyl)lactate | 0.097                   | 0.006  | 5.1E-52 |                          |        |         |          |       |         |
| indolepropionate           | -0.007                  | 0.001  | 3.4E-08 |                          |        |         |          |       |         |
| 4-ethylphenylsulfate       | -0.005                  | 0.001  | 9.8E-04 |                          |        |         |          |       |         |
| trimethylamine N-oxide     | 0.008                   | 0.002  | 9.9E-04 |                          |        |         |          |       |         |
| glycocholate               |                         |        |         | 0.002                    | 0.0004 | 1.3E-09 |          |       |         |
| spermidine                 |                         |        |         | 0.001                    | 0.0004 | 0.020   |          |       |         |
| 3-indoxyl sulfate          |                         |        |         | 0.005                    | 0.0009 | 6.7E-09 |          |       |         |
| Indolepropionate           |                         |        |         | -0.001                   | 0.0004 | 0.032   |          |       |         |
| glycocholenate sulfate*    |                         |        |         |                          |        |         | 0.016    | 0.003 | 1.2E-05 |

Supplementary Table S2. Results of Mendelian randomization analyses to test causal relationships with three metabolites most strongly associated with clinical traits.

| Metabolite (Exposure)      | Outcome | Method                       | No. of Instrumental Variables | Beta   | SE    | p-value           |
|----------------------------|---------|------------------------------|-------------------------------|--------|-------|-------------------|
| 3-(4-hydroxyphenyl)lactate | TG      | WM                           | 4                             | -0.046 | 0.010 | <b>&lt;0.0001</b> |
| 3-(4-hydroxyphenyl)lactate | TG      | IVW                          | 4                             | -0.043 | 0.019 | <b>0.022</b>      |
| 3-(4-hydroxyphenyl)lactate | TG      | MR Egger                     | 4                             | 0.010  | 0.095 | 0.927             |
| 3-(4-hydroxyphenyl)lactate | TG      | Pleiotropy - Egger Intercept |                               | -0.008 | 0.014 | 0.622             |
| 3-(4-hydroxyphenyl)lactate | TC      | WM                           | 4                             | -0.046 | 0.010 | <b>&lt;0.0001</b> |
| 3-(4-hydroxyphenyl)lactate | TC      | IVW                          | 4                             | -0.043 | 0.019 | <b>0.022</b>      |
| 3-(4-hydroxyphenyl)lactate | TC      | MR Egger                     | 4                             | 0.010  | 0.095 | 0.927             |
| 3-(4-hydroxyphenyl)lactate | TC      | Pleiotropy - Egger Intercept |                               | -0.008 | 0.014 | 0.622             |
| 3-(4-hydroxyphenyl)lactate | LDL     | WM                           | 4                             | -0.037 | 0.010 | <b>0.00016</b>    |
| 3-(4-hydroxyphenyl)lactate | LDL     | IVW                          | 4                             | -0.038 | 0.023 | 0.095             |
| 3-(4-hydroxyphenyl)lactate | LDL     | MR Egger                     | 4                             | -0.087 | 0.118 | 0.539             |
| 3-(4-hydroxyphenyl)lactate | LDL     | Pleiotropy - Egger Intercept |                               | 0.007  | 0.017 | 0.715             |
| 3-(4-hydroxyphenyl)lactate | HDL     | WM                           | 4                             | 0.009  | 0.009 | 0.326             |
| 3-(4-hydroxyphenyl)lactate | HDL     | IVW                          | 4                             | 0.011  | 0.013 | 0.414             |
| 3-(4-hydroxyphenyl)lactate | HDL     | MR Egger                     | 4                             | -0.051 | 0.056 | 0.458             |
| 3-(4-hydroxyphenyl)lactate | HDL     | Pleiotropy - Egger Intercept |                               | 0.009  | 0.008 | 0.373             |
| 3-(4-hydroxyphenyl)lactate | BMI     | WM                           | 3                             | -0.028 | 0.024 | 0.241             |
| 3-(4-hydroxyphenyl)lactate | BMI     | IVW                          | 3                             | -0.030 | 0.036 | 0.412             |
| 3-(4-hydroxyphenyl)lactate | BMI     | MR Egger                     | 3                             | 0.140  | 0.053 | 0.231             |
| 3-(4-hydroxyphenyl)lactate | BMI     | Pleiotropy - Egger Intercept |                               | -0.024 | 0.007 | 0.185             |
| 3-(4-hydroxyphenyl)lactate | WHR     | WM                           | 3                             | -0.036 | 0.020 | 0.068             |
| 3-(4-hydroxyphenyl)lactate | WHR     | IVW                          | 3                             | -0.025 | 0.017 | 0.139             |
| 3-(4-hydroxyphenyl)lactate | WHR     | MR Egger                     | 3                             | 0.047  | 0.054 | 0.544             |
| 3-(4-hydroxyphenyl)lactate | WHR     | Pleiotropy - Egger Intercept |                               | -0.010 | 0.007 | 0.395             |
| 3-(4-hydroxyphenyl)lactate | Glucose | IVW                          | 2                             | 0.038  | 0.073 | 0.603             |
| 3-(4-hydroxyphenyl)lactate | Insulin | IVW                          | 2                             | 0.019  | 0.058 | 0.740             |
| 3-(4-hydroxyphenyl)lactate | HbA1c   | WM                           | 4                             | 0.000  | 0.009 | 0.998             |
| 3-(4-hydroxyphenyl)lactate | HbA1c   | IVW                          | 4                             | -0.001 | 0.009 | 0.924             |
| 3-(4-hydroxyphenyl)lactate | HbA1c   | MR Egger                     | 4                             | -0.009 | 0.051 | 0.883             |
| 3-(4-hydroxyphenyl)lactate | HbA1c   | Pleiotropy - Egger Intercept |                               | 0.001  | 0.008 | 0.892             |
| 3-(4-hydroxyphenyl)lactate | SBP     | WM                           | 3                             | 0.501  | 0.290 | 0.085             |
| 3-(4-hydroxyphenyl)lactate | SBP     | IVW                          | 3                             | 0.485  | 0.242 | <b>0.044</b>      |
| 3-(4-hydroxyphenyl)lactate | SBP     | MR Egger                     | 3                             | 0.148  | 0.852 | 0.891             |

|                            |         |                                 |   |        |       |              |
|----------------------------|---------|---------------------------------|---|--------|-------|--------------|
| 3-(4-hydroxyphenyl)lactate | SBP     | Pleiotropy -<br>Egger Intercept |   | 0.047  | 0.113 | 0.751        |
| 3-(4-hydroxyphenyl)lactate | DBP     | WM                              | 3 | -0.062 | 0.176 | 0.724        |
| 3-(4-hydroxyphenyl)lactate | DBP     | IVW                             | 3 | -0.033 | 0.175 | 0.848        |
| 3-(4-hydroxyphenyl)lactate | DBP     | MR Egger                        | 3 | 0.798  | 0.489 | 0.350        |
| 3-(4-hydroxyphenyl)lactate | DBP     | Pleiotropy -<br>Egger Intercept |   | -0.115 | 0.065 | 0.327        |
| 3-aminoisobutyrate         | TG      | WM                              | 8 | -0.001 | 0.003 | 0.710        |
| 3-aminoisobutyrate         | TG      | IVW                             | 8 | -0.036 | 0.074 | 0.625        |
| 3-aminoisobutyrate         | TG      | MR Egger                        | 8 | 0.131  | 0.111 | 0.282        |
| 3-aminoisobutyrate         | TG      | Pleiotropy -<br>Egger Intercept |   | -0.054 | 0.029 | 0.114        |
| 3-aminoisobutyrate         | TC      | WM                              | 8 | -0.001 | 0.003 | 0.711        |
| 3-aminoisobutyrate         | TC      | IVW                             | 8 | -0.036 | 0.074 | 0.625        |
| 3-aminoisobutyrate         | TC      | MR Egger                        | 8 | 0.131  | 0.111 | 0.282        |
| 3-aminoisobutyrate         | TC      | Pleiotropy -<br>Egger Intercept |   | -0.054 | 0.029 | 0.114        |
| 3-aminoisobutyrate         | LDL     | WM                              | 8 | 0.002  | 0.003 | 0.438        |
| 3-aminoisobutyrate         | LDL     | IVW                             | 8 | -0.007 | 0.021 | 0.747        |
| aminoisobutyrate           | LDL     | MR Egger                        | 8 | 0.035  | 0.033 | 0.324        |
| aminoisobutyrate           | LDL     | Pleiotropy -<br>Egger Intercept | 8 | -0.014 | 0.009 | 0.168        |
| aminoisobutyrate           | HDL     | WM                              | 8 | 0.002  | 0.003 | 0.564        |
| aminoisobutyrate           | HDL     | IVW                             | 8 | 0.005  | 0.005 | 0.355        |
| aminoisobutyrate           | HDL     | MR Egger                        | 8 | -0.009 | 0.006 | 0.210        |
| aminoisobutyrate           | HDL     | Pleiotropy -<br>Egger Intercept |   | 0.004  | 0.002 | <b>0.041</b> |
| aminoisobutyrate           | BMI     | WM                              | 7 | 0.002  | 0.004 | 0.523        |
| aminoisobutyrate           | BMI     | IVW                             | 7 | 0.005  | 0.007 | 0.430        |
| aminoisobutyrate           | BMI     | MR Egger                        | 7 | -0.010 | 0.009 | 0.306        |
| aminoisobutyrate           | BMI     | Pleiotropy -<br>Egger Intercept |   | 0.005  | 0.002 | 0.094        |
| aminoisobutyrate           | WHR     | WM                              | 7 | -0.005 | 0.004 | 0.187        |
| aminoisobutyrate           | WHR     | IVW                             | 7 | -0.006 | 0.006 | 0.316        |
| aminoisobutyrate           | WHR     | MR Egger                        | 7 | 0.000  | 0.010 | 0.979        |
| aminoisobutyrate           | WHR     | Pleiotropy -<br>Egger Intercept |   | -0.002 | 0.003 | 0.561        |
| aminoisobutyrate           | Glucose | WM                              | 5 | 0.001  | 0.006 | 0.911        |
| aminoisobutyrate           | Glucose | IVW                             | 5 | -0.007 | 0.029 | 0.815        |
| aminoisobutyrate           | Glucose | MR Egger                        | 5 | 0.044  | 0.057 | 0.502        |
| aminoisobutyrate           | Glucose | Pleiotropy -<br>Egger Intercept |   | -0.018 | 0.017 | 0.383        |
| aminoisobutyrate           | Insulin | WM                              | 5 | 0.002  | 0.007 | 0.739        |
| aminoisobutyrate           | Insulin | IVW                             | 5 | 0.001  | 0.018 | 0.949        |
| aminoisobutyrate           | Insulin | MR Egger                        | 5 | 0.015  | 0.041 | 0.738        |
| aminoisobutyrate           | Insulin | Egger Intercept                 |   | -0.005 | 0.012 | 0.722        |
| aminoisobutyrate           | HbA1c   | WM                              | 8 | -0.006 | 0.003 | 0.047        |

|                    |         |                                 |   |        |       |              |
|--------------------|---------|---------------------------------|---|--------|-------|--------------|
| aminoisobutyrate   | HbA1c   | IVW                             | 8 | -0.003 | 0.006 | 0.593        |
| aminoisobutyrate   | HbA1c   | MR Egger                        | 8 | -0.004 | 0.011 | 0.731        |
| aminoisobutyrate   | HbA1c   | Pleiotropy -<br>Egger Intercept |   | 0.000  | 0.003 | 0.930        |
| aminoisobutyrate   | SBP     | WM                              | 7 | -0.073 | 0.078 | 0.348        |
| aminoisobutyrate   | SBP     | IVW                             | 7 | -0.163 | 0.153 | 0.287        |
| aminoisobutyrate   | SBP     | MR Egger                        | 7 | 0.047  | 0.264 | 0.864        |
| aminoisobutyrate   | SBP     | Pleiotropy -<br>Egger Intercept |   | -0.068 | 0.069 | 0.372        |
| aminoisobutyrate   | DBP     | WM                              | 7 | -0.063 | 0.043 | 0.140        |
| aminoisobutyrate   | DBP     | IVW                             | 7 | -0.083 | 0.058 | 0.152        |
| aminoisobutyrate   | DBP     | MR Egger                        | 7 | 0.023  | 0.092 | 0.809        |
| aminoisobutyrate   | DBP     | Pleiotropy -<br>Egger Intercept |   | -0.034 | 0.024 | 0.214        |
| N-acetyltryptophan | TG      | IVW                             | 2 | 0.008  | 0.005 | 0.096        |
| N-acetyltryptophan | TC      | IVW                             | 2 | 0.008  | 0.005 | 0.096        |
| N-acetyltryptophan | LDL     | IVW                             | 2 | -0.006 | 0.005 | 0.263        |
| N-acetyltryptophan | HDL     | IVW                             | 2 | -0.011 | 0.005 | <b>0.027</b> |
| N-acetyltryptophan | BMI     | IVW                             | 2 | 0.017  | 0.007 | <b>0.010</b> |
| N-acetyltryptophan | WHR     | IVW                             | 2 | 0.008  | 0.007 | 0.251        |
| N-acetyltryptophan | Glucose | IVW                             | 2 | 0.005  | 0.012 | 0.693        |
| N-acetyltryptophan | Insulin | IVW                             | 2 | 0.028  | 0.020 | 0.157        |
| N-acetyltryptophan | HbA1c   | IVW                             | 2 | 0.010  | 0.005 | <b>0.042</b> |
| N-acetyltryptophan | SBP     | IVW                             | 2 | 0.024  | 0.251 | 0.923        |
| N-acetyltryptophan | DBP     | IVW                             | 2 | 0.102  | 0.063 | 0.110        |

SE: standard error; TG; triglycerides; TC: total cholesterol; LDL: low density lipoprotein; HDL: high density lipoprotein; BMI: body mass index; WHR: waist-to-hip ratio; HbA1C: hemoglobin A1C; SBP systolic blood pressure; DBP: diastolic blood pressure; WM: weighted median; IVW: inverse variance weighted.
